# Supplementary material
Source: Springer Nature journal article supplement (https://springermedizin.de/resource/supplementary/12984_2011_326_MOESM3_ESM.pdf/9605790)

A

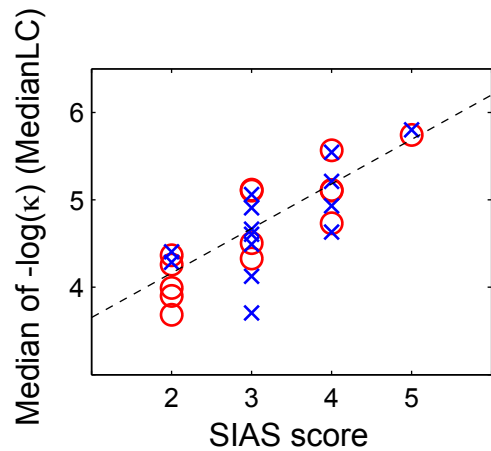

B

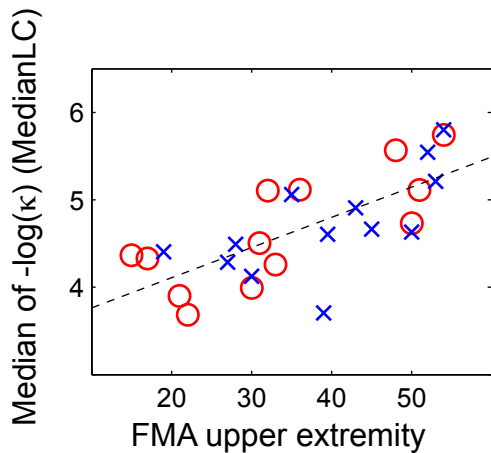

C

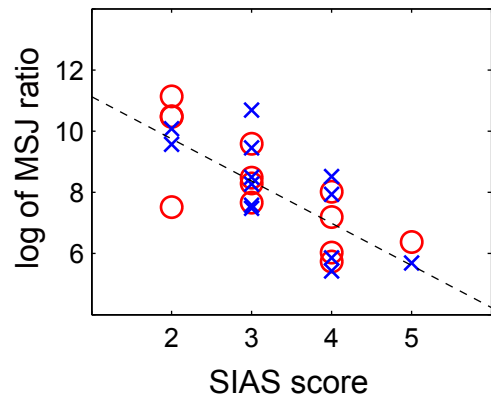

D

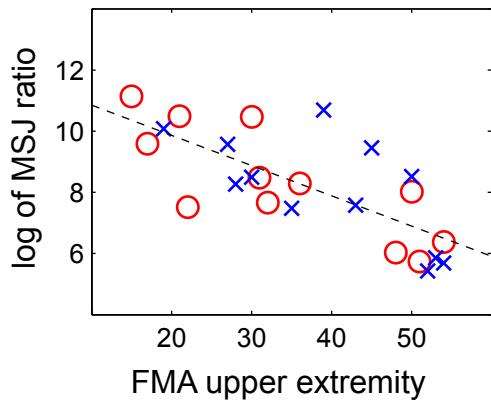

○ initial score  
 × final score

Supplement: MOESM3 [file 9605790]
